# Supplementary material
Source: Springer Nature journal article supplement (https://www.springermedizin.de/resource/supplementary/40478_2013_37_MOESM12_ESM.pdf/25658000)

**a**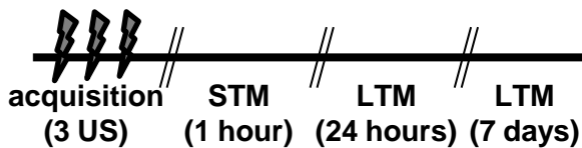**b**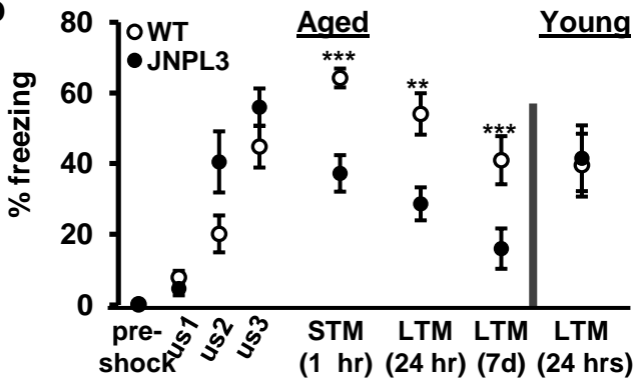**c**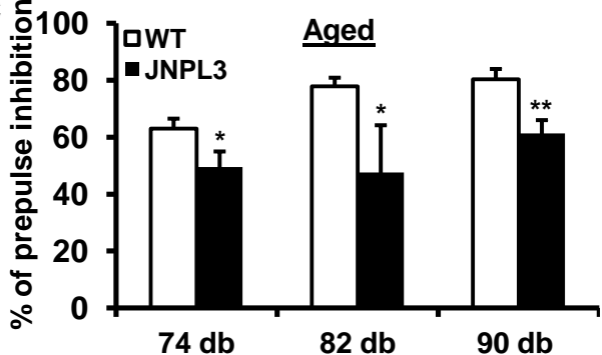**d**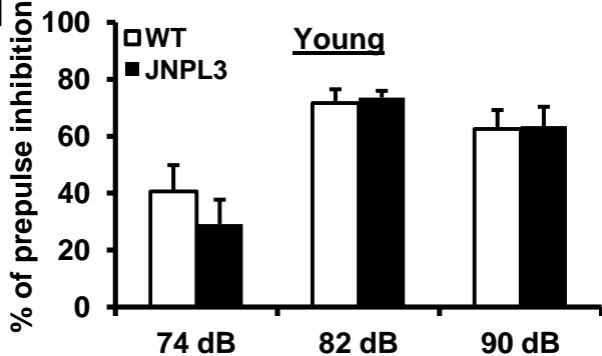

Supplement: MOESM12 [file 25658000]
